# Microbial helpers allow cyanobacteria to thrive in ferruginous waters

## Microbial helpers allow cyanobacteria to thrive in ferruginous waters

Nadia Szeinbaum<sup>\*1</sup>, Yael Toporek<sup>2</sup>, Christopher T. Reinhard<sup>1</sup>, and Jennifer B. Glass<sup>\*1</sup>

<sup>1</sup>School of Earth and Atmospheric Sciences, Georgia Institute of Technology, Atlanta, GA

<sup>2</sup>School of Biological Sciences, Georgia Institute of Technology, Atlanta, GA

\*Corresponding authors: [nadia.szeinbaum@biology.gatech.edu](mailto:nadia.szeinbaum@biology.gatech.edu); [jennifer.glass@eas.gatech.edu](mailto:jennifer.glass@eas.gatech.edu)

Running title: Cyanobacterial fitness in early oceans

**Acknowledgements.** This research was funded by NASA Exobiology grant NNX14AJ87G, NASA Astrobiology Institute grant 13-13NAI7\_2-0027, and a NASA Astrobiology Postdoctoral Fellowship to NS. We thank Jennifer Thweatt for advice on culturing *Synechococcus* sp. PCC 7002. We thank Amit Reddi for allowing us to use his plate reading spectrometer. We thank Sommer Durham for technical assistance with the cytometer. We thank Patricia Sanchez-Baracaldo and Manuel Kleiner for helpful discussions.

**Competing Interests:** The authors declare no competing interests.

## Microbial helpers allow cyanobacteria to thrive in ferruginous waters

### Abstract

The Great Oxidation Event (GOE) was a rapid accumulation of oxygen in the atmosphere as a result of the photosynthetic activity of cyanobacteria. This accumulation reflected the pervasiveness of O<sub>2</sub> on the planet's surface, indicating that cyanobacteria had become ecologically successful in Archean oceans. Micromolar concentrations of Fe<sup>2+</sup> in Archean oceans would have reacted with hydrogen peroxide, a byproduct of oxygenic photosynthesis, to produce hydroxyl radicals, which cause cellular damage. Yet cyanobacteria colonized Archean oceans extensively enough to oxygenate the atmosphere, which likely required protection mechanisms against the negative impacts of hydroxyl radical production in Fe<sup>2+</sup>-rich seas. We identify several factors that could have acted to protect early cyanobacteria from the impacts of hydroxyl radical production and hypothesize that microbial cooperation may have played an important role in protecting cyanobacteria from Fe<sup>2+</sup> toxicity before the GOE. We found that several strains of facultative anaerobic heterotrophic bacteria (*Shewanella*) with ROS defense mechanisms increase the fitness of cyanobacteria (*Synechococcus*) in ferruginous waters. *Shewanella* species with manganese transporters provided the most protection. Our results suggest that a tightly regulated response to prevent Fe<sup>2+</sup> toxicity could have been important for the colonization of ancient ferruginous oceans, particularly in the presence of high manganese concentrations, and may expand the upper bound for tolerable Fe<sup>2+</sup> concentrations for cyanobacteria.

## Microbial helpers allow cyanobacteria to thrive in ferruginous waters

### Introduction

Earth's first biogeochemical cycles were driven by anaerobic microorganisms (Canfield et al., 2006; Martin et al., 2018). At around 2.3 Ga, the Great Oxidation Event (GOE) resulted in the initial oxygenation of the atmosphere and surficial biosphere, which ultimately led to the modern dominance of aerobic organisms on Earth's surface (Bar-On et al., 2018; Luo et al., 2016). Although biological O<sub>2</sub> production was a prerequisite for the GOE (Haqq-Misra et al., 2011; Holland, 2002), oxygenic photosynthesis may have emerged in cyanobacteria hundreds of millions of years prior to the initial accumulation of O<sub>2</sub> in Earth's atmosphere (Cardona et al., 2019; Lalonde and Konhauser, 2015; Ossa Ossa et al., 2018; Planavsky et al., 2014). The delay between the emergence of cyanobacterial O<sub>2</sub> production and O<sub>2</sub> accumulation in the atmosphere may have been modulated by geophysical drivers (Catling et al., 2001; Holland, 2009; Lee et al., 2016), but may also reflect the time required for metabolic innovations to appear in early cyanobacteria or for the emergence of ecological linkages with other microbes facilitating the success of cyanobacteria (Blank and Sanchez-Baracaldo, 2010; Johnston et al., 2009; Lyons et al., 2014; Ozaki et al., 2019). Understanding how cyanobacteria cooperated with other microbes to colonize the Earth's surface is thus essential to understand the ecology and tempo of the GOE.

The emergence of oxygenic photosynthesis in cyanobacteria occurred in the Archean (Chisholm, 2017; Kendall et al., 2010; Konhauser et al., 2011; Lalonde and Konhauser, 2015; Lyons et al., 2014; Olson et al., 2013; Planavsky et al., 2014; Reinhard et al., 2013b). The metabolic expansion of cyanobacteria before the GOE may reflect their transition from land to Fe<sup>2+</sup>-rich Archean oceans (Herrmann and Gehring, 2019). This transition would have been physiologically challenging due to Fe<sup>2+</sup> toxicity from its reactions with reactive oxygen species (ROS) produced during photosynthesis (Swanner et al., 2015a). Archean oceans likely contained tens to hundreds of micromolar Fe<sup>2+</sup> within the ocean interior (Canfield, 2005; Derry, 2015; Drever, 1974; Holland, 1973; Song et al., 2017; Thompson et al., 2019), which would have reacted rapidly in the surface ocean with O<sub>2</sub> produced from photosynthesis and any hydrogen peroxide (H<sub>2</sub>O<sub>2</sub>) from photochemical reactions between O<sub>2</sub> and dissolved organic matter, as well as enzymes like superoxide dismutase (Hansel and Diaz, 2020; Zinser, 2018b). This Fe<sup>2+</sup>-driven reaction, known as the Fenton reaction, produces hydroxyl radicals (·OH; Eq. 1):

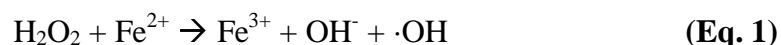

## Microbial helpers allow cyanobacteria to thrive in ferruginous waters

Hydroxyl radicals cause cellular damage, especially to DNA (Imlay, 2003; Imlay, 2008). Yet, cyanobacteria must have colonized vast areas of the ocean in order to oxygenate the atmosphere. Cyanobacteria may have been protected by spatial separation of oxygenic and anoxygenic phototrophs that could have removed upwelled ferrous iron prior to its arrival at the surface (Ozaki et al., 2019), though the potential effectiveness of this would depend on the Fe/P ratio of deep waters. Anti-oxidants such as elevated dissolved manganese ( $Mn^{2+}$ ) and ancient Mn-based catalases may have protected ancient cyanobacteria against ROS toxicity (Fischer et al., 2016; Lingappa et al., 2019).

Here, we test the hypothesis that heterotrophic microbial “helpers” may have protected cyanobacteria from ROS produced by Fenton chemistry in Archean oceans, thereby increasing cyanobacterial fitness and enabling their ecological success. Such microbial cooperation is common among modern cyanobacteria and heterotrophic proteobacteria (Christie-Oleza et al., 2017; Morris et al., 2011; Morris et al., 2008; Zinser, 2018a), whose intimate relationship is evidenced by extensive horizontal gene transfer (Ben Said and Or, 2017; Braakman et al., 2017; Goldenfeld and Woese, 2011). At the time of the GOE, many bacterial lineages, including Proteobacteria, had already diversified (Battistuzzi et al., 2004; Cavalier-Smith, 2006a; Cavalier-Smith, 2006b), which would have increased the phenotypic pool available for cooperation. Including microbial cooperation as an ecological mechanism in models of early Earth’s ecological history might provide a more realistic picture of the ancient interactions that ultimately led to the GOE.

We explored whether the presence of “helper” heterotrophic proteobacteria leads to increased fitness of cyanobacteria in ferruginous conditions. For a model cyanobacterium, we chose *Synechococcus* sp. PCC 7002 (hereafter *Synechococcus*), which was previously shown to experience  $Fe^{2+}$  toxicity at  $>100 \mu M Fe^{2+}$  associated with increased intracellular ROS production (Swanner et al., 2015a). As potential “helper” bacteria, we chose *Shewanella*, facultative anaerobic gammaproteobacteria that can survive  $O_2$  intrusions in the presence of high  $Fe^{2+}$  using diverse  $H_2O_2$ -scavenging enzymes (Jiang et al., 2014; Mishra and Imlay, 2012; Sekar et al., 2016). Experimental conditions loosely simulated a pre-GOE illuminated ferruginous surface ocean overlain by a  $CO_2$ - and  $H_2$ -rich anoxic atmosphere. We found that several *Shewanella* species allowed *Synechococcus* to grow in ferruginous conditions that significantly impaired growth of *Synechococcus* monocultures. The “helper” *Shewanella* strains all contained the ability

## Microbial helpers allow cyanobacteria to thrive in ferruginous waters

to actively uptake dissolved manganese ( $Mn^{2+}$ ) via the natural resistance-associated macrophage protein (NRAMP) family MntH  $Mn^{2+}$  transporter, a strategy that has previously been shown to correlate with ROS survival (Daly et al., 2004). Our results stress the importance of considering microbial cooperation and alternative ROS strategies, such as manganese protection, in models of early Earth microbial ecology.

## Results

***Cyanobacteria growth is impaired in ferruginous conditions and is restored in the presence of some proteobacteria.*** We found that *Synechococcus* growth in the presence of elevated  $Fe^{2+}$  improved (to a varying degree) in the presence of all *Shewanella* spp. tested. In monoculture, *Synechococcus* had similar growth rate and yield at 25 and 500  $\mu M$   $Fe^{2+}$ , but a longer lag period at 500  $\mu M$   $Fe^{2+}$  (~2 days) than at 25  $\mu M$   $Fe^{2+}$  (~1 day; **Fig. 1A**). At 1000  $\mu M$   $Fe^{2+}$ , *Synechococcus* growth was significantly impaired in monoculture, reaching only 10% the cell density of cultures with 25 and 500  $\mu M$   $Fe^{2+}$  (**Fig. 1A**). *Synechococcus* growth was mostly recovered in the presence of high  $Fe^{2+}$  when grown in co-culture with *Shewanella baltica* OS-155, although the initial lag period was extended (**Fig. 1B**). In the presence of *Shewanella algae* MN-01 (**Fig. 1C**) and *Shewanella loihica* PV-4 (**Fig. 1D**), *Synechococcus* growth was partially recovered at high  $Fe^{2+}$ . Other than an extended lag phase, *Shewanella algae* BrY (**Fig. 1E**) and *Shewanella oneidensis* MR-1 (**Fig. 1F**) had minimal influence on *Synechococcus* growth, compared to the monoculture (**Fig. 1A**), in all three  $Fe^{2+}$  treatments. Although difficult to quantify due to spectral interference of Fe(III) oxide particles, *Shewanella* cell numbers declined throughout the experiment (data not shown).

***The best proteobacterial helpers are the least  $H_2O_2$  sensitive, and the best  $H_2O_2$  scavengers.*** We measured growth and  $H_2O_2$  scavenging rates of *Shewanella* spp. in the presence of varying  $H_2O_2$ . *S. baltica* OS-155 was the least sensitive to  $H_2O_2$  (**Fig. 2A**). *S. algae* MN-01 (**Fig. 2B**), *S. loihica* PV-4 (**Fig. 2C**), and *S. algae* BrY (**Fig. 2D**) were moderately sensitive to  $H_2O_2$ . *S. oneidensis* MR-01 was the most sensitive to  $H_2O_2$  (**Fig. 2D**). Along with being most  $H_2O_2$  tolerant, *S. algae* MN-01 and *S. baltica* OS-155 had the highest rates of  $H_2O_2$  scavenging activity, followed by *S. algae* BrY (**Fig. 3**). *S. loihica* PV-4 and *S. oneidensis* MR-1 had the lowest  $H_2O_2$  scavenging rates (**Fig. 3**).

## Microbial helpers allow cyanobacteria to thrive in ferruginous waters

**Manganese may protect cyanobacteria from  $Fe^{2+}$  toxicity.** To test whether  $Mn^{2+}$  can protect cyanobacteria from  $Fe^{2+}$  toxicity, we grew *Synechococcus* PCC 7002 (four replicates per treatment) under anoxic conditions with the addition of 1 mM  $Fe^{2+}$  and/or 1 mM  $Mn^{2+}$ . Cells with 1 mM  $Mn^{2+}$  grew similarly to the controls (**Fig. 4**). The A+ medium contained background concentrations of ~140  $\mu M$   $Fe^{2+}$  and ~220  $\mu M$   $Mn^{2+}$ . No growth occurred with 1 mM  $Fe^{2+}$ . Red Fe(III) oxide particles indicated that  $Fe^{2+}$  had been oxidized and precipitated, as observed by Swanner et al. (2015b). Treatments with 1 mM  $Fe^{2+}$  and 1 mM  $Mn^{2+}$  resembled 1 mM  $Fe^{2+}$  treatments for approximately the first week. Between 4-13 days, two out of four of the  $Fe^{2+}$  and  $Mn^{2+}$  treatments grew to maximal OD<sub>750</sub>. In the next three months, another of the  $Fe^{2+}$  and  $Mn^{2+}$  treatments also turned green (data not shown). These results show that 1 mM  $Mn^{2+}$  is not toxic to cyanobacteria and may in fact aid in the survival of cyanobacteria  $Fe^{2+}$  toxicity, after an acclimation period. The mechanism underlying the apparent protective effect of  $Mn^{2+}$  that rescued growth for three out of four cultures in high  $Fe^{2+}$  after an extended lag phase remains unknown.

**The best proteobacterial helpers encode additional genes for  $H_2O_2$  degradation.** *Synechococcus* PCC 7002's susceptibility to  $Fe^{2+}$  toxicity is consistent with the limited number of catalase genes in its genome; it encodes cytoplasmic KatG but not periplasmic KatE (**Table 1**). Without KatE to scavenge  $H_2O_2$  in the periplasm,  $H_2O_2$  can react with  $Fe^{2+}$  to generate  $\cdot OH$  intracellularly (**Eq. 1**). Like *Synechococcus* PCC 7002, most marine cyanobacteria are KatE-negative; a BLAST search of cyanobacterial genomes in NCBI recovered KatE catalase homologs almost exclusively in freshwater and soil cyanobacteria (**Table S1**).

To identify genes in *Shewanella* that may have helped alleviate  $Fe^{2+}$  toxicity to *Synechococcus*, we compared the genomes of the *Shewanella* strains in our experiments. Notably, several *Shewanella* spp. contained catalases predicted to have multiple cellular locations, as previously observed for other microbial catalases (Hanaoka et al., 2013). Overall, the genomic inventory of catalase and peroxidase proteins was generally similar between the more protective and less protective species (**Table 1**), suggesting (an)other mechanism(s) for ROS survival. We found 52 proteins in the best helpers (OS-155 and MN-01) that were not present in the other *Shewanella* strains, including genes for flagella, phenazine biosynthesis, and transporters (**Table S3**). Flagella may be involved in the ROS-stress response in eukaryotes (Hajam et al., 2017), but their connection to ROS protection in bacteria, if any, is unknown.



## Microbial helpers allow cyanobacteria to thrive in ferruginous waters

Phenazines are known to produce oxidative stress (Imlay, 2013), and can also mediate extracellular redox transfers (Hernandez et al., 2004; Wang and Newman, 2008), but are unlikely to be responsible for the protective effect because *Synechococcus* PCC 7002 also possesses the *phzF* gene for phenazine synthesis.

The high H<sub>2</sub>O<sub>2</sub> sensitivity of *S. oneidensis* MR-1, which contains a similar repertoire of H<sub>2</sub>O<sub>2</sub>-scavenging enzymes as less H<sub>2</sub>O<sub>2</sub>-sensitive *Shewanella* spp., is thought to be due to its inability to actively transport and accumulate intracellular Mn<sup>2+</sup> (Daly et al., 2004; Jiang et al., 2014). We surmised that differences in ROS scavenging rates between *Shewanella* strains may be due to differences in acquisition of Mn<sup>2+</sup>. We found MntH Mn<sup>2+</sup> transporters in the genomes of the three top *Shewanella* helpers: OS-155, MN-01, and PV-4 (Table 1). *Shewanella* BrY and MR-1 lacked characterized Mn<sup>2+</sup> transporters. *Synechococcus* PCC 7002 contained genes for the ATP-binding cassette (ABC) family Mn<sup>2+</sup> transporters MntABCD and SitABCD transporter instead of MntH.

## Discussion

The rise of O<sub>2</sub> and ROS from oxygenic photosynthesis would have severely stressed strictly anaerobic microbes (Khademian and Imlay, 2020), resulting in what was perhaps Earth's first mass extinction. Experiments demonstrating that catalase-negative cyanobacteria (*Synechococcus* PCC 7002) grew poorly in >100 μM Fe<sup>2+</sup> led to the idea that Fe<sup>2+</sup>-rich oceans would have slowed cyanobacterial colonization of the ocean surface and possibly delayed global oxygenation (Swanner et al., 2015a). Our study confirms the previous finding that *Synechococcus* PCC 7002, originally isolated from marine mud, has impaired growth when Fe<sup>2+</sup> was 180 μM and higher. We show that this Fe<sup>2+</sup> toxicity can be alleviated by some strains of “helper” *Shewanella* spp., with the best protection afforded by *Shewanella* strains possessing the most varied sets of ROS-defense pathways (e.g. catalases, MntH transporters) and the highest rates of H<sub>2</sub>O<sub>2</sub> degradation. Likely, this protection was afforded by *Shewanella* scavenging H<sub>2</sub>O<sub>2</sub> prior to its reaction with Fe<sup>2+</sup>, thereby decreasing the production of damaging hydroxyl radicals.

Thus, our findings align with previous findings (Brown et al., 2010; Ward et al., 2019) that cyanobacterial colonization of early oceans would not have been hampered by micromolar Fe<sup>2+</sup> concentrations, if Mn<sup>2+</sup>-transporting and H<sub>2</sub>O<sub>2</sub>-scavenging genes were present within the microbial communal gene pool. Early marine cyanobacteria, like modern terrestrial

## Microbial helpers allow cyanobacteria to thrive in ferruginous waters

cyanobacteria, likely had myriad protections against  $\text{Fe}^{2+}$  and/or may have benefitted from the presence of co-existing “helper” bacteria to cope with the harmful byproducts produced by their own metabolism in a ferruginous ocean, which would have later been lost due to genome streamlining in marine cyanobacteria.

**Catalase-based protection.** The ubiquity of catalase genes in the genomes of all the *Shewanella* strains we studied suggests that catalase accounts for the background protection provided by all *Shewanella* spp. tested. The enhanced protection provided by *Shewanella* spp. with similar catalase inventories implies that a mechanism other than catalase was likely at play, presumably at the level of gene expression. This process may also be related to the centralized regulation of  $\text{H}_2\text{O}_2$ -related genes in *Shewanella* spp. In *S. oneidensis* MR-1, the transcriptional regulator OxyR is key for suppression of Fenton chemistry by derepression of KatE and Dps (Jiang et al., 2014; Wan et al., 2018) whereas  $\text{H}_2\text{O}_2$ -based regulation is performed by multiple regulators (including PerR) in *Synechococcus* PCC 7002 and other cyanobacteria (Latifi et al., 2009).

A protective effect of proteobacterial catalase has previously been observed for the marine cyanobacterium *Prochlorococcus*, which grows in symbiosis with the gammaproteobacterium *Alteromonas* (Biller et al., 2016; Morris et al., 2011; Morris et al., 2008). (For more examples of microbe-microbe  $\text{H}_2\text{O}_2$  protection, see review by Zinser (2018a).) Yet, unlike those long-lived catalase-based symbioses, the presence of *Shewanella* in our co-cultures was ultimately transient; *Synechococcus* gained the fitness advantage of protection from  $\text{Fe}^{2+}$  toxicity at the expense of *Shewanella*, whose population was eliminated from the system as *Synechococcus* grew. Indeed, previous attempts to co-culture *Shewanella* with cyanobacteria with  $\sim 15 \mu\text{M}$   $\text{Fe}^{2+}$ , resulted in cyanobacterial dominance, with *Shewanella*’s growth yield was compromised by the presence of *Synechococcus* sp. 7002 even in the presence of organic carbon (Beliaev et al., 2014).

Thus, our co-culture experiments illustrate that cyanobacteria can benefit from the presence of “helper” proteobacteria under ferruginous conditions. This protection may have been one of the ways that cyanobacteria were able to cope with the harmful byproducts produced by their own metabolism as they incipiently colonized a ferruginous ocean, which would have no longer been necessary once cyanobacteria increased in numbers and seawater  $\text{Fe}^{2+}$  concentrations dropped. The precise levels of dissolved  $\text{O}_2$  prevailing on different spatial scales in the surface



## Microbial helpers allow cyanobacteria to thrive in ferruginous waters

ocean prior to the GOE are not fully known. However, there is theoretical evidence to suggest that dissolved  $O_2$  would have been locally more than sufficient to support aerobic bacterial respiration (Olson et al., 2013; Reinhard et al., 2013a).

***Manganese to the rescue.*** One of the genes regulated by OxyR is the  $Mn^{2+}$  transporter MntH, which is used to accumulate intracellular manganese ( $Mn^{2+}$ ) as a potent ROS detoxification method (Anjem et al., 2009; Chen et al., 2008; Kehres et al., 2002). Unlike  $Fe^{2+}$ ,  $Mn^{2+}$  does not undergo Fenton-type reactions. Instead,  $Mn^{2+}$  has strong antioxidant properties (Cheton and Archibald, 1988) and is highly effective at protecting against  $H_2O_2$ -induced oxidative stress through multiple mechanisms (Aguirre and Culotta, 2012; Hansel, 2017; Horsburgh et al., 2002; Latour, 2015; Papp-Wallace and Maguire, 2006).  $Mn^{2+}$ -carbonate and  $Mn^{2+}$ -phosphate complexes can chemically disproportionate  $H_2O_2$  (Archibald and Fridovich, 1982; Barnese et al., 2012; Stadtman et al., 1990).  $Mn^{2+}$ -containing catalase, a very ancient member of the ferritin superfamily, detoxifies  $H_2O_2$  (Klotz and Loewen, 2003; Zamocky et al., 2008). Under  $H_2O_2$  stress, OxyR facilitates  $Mn^{2+}$  replacement of  $Fe^{2+}$  in ROS-sensitive enzymes, preventing their inactivation by Fenton chemistry (Anjem et al., 2009; Smethurst et al., 2020; Sobota and Imlay, 2011).

In monocultures, the rescued growth of *Synechococcus* PCC 7002 in two out of four of high  $Fe^{2+}$  treatments with 1 mM  $Mn^{2+}$  was likely related to the antioxidant properties of  $Mn^{2+}$ , although the details of the protective mechanism, chemical or enzymatic, await further study. MntH transporters were found in the most protective *Shewanella* strains, but not in *Synechococcus* PCC 7002 (which instead encodes two ABC-type  $Mn^{2+}$  transporters) nor in the less protective *Shewanella* spp. (**Table S1**). Although further experimentation at more environmentally relevant  $Mn^{2+}$  concentrations is needed, our initial findings generally support the hypothesis that elevated seawater  $Mn^{2+}$  in early Earth environments (~5-120  $\mu M$ ; Holland, 1984; Johnson et al., 2016; Komiya et al., 2008; Liu et al., 2020) played a role in protecting marine cyanobacteria from ROS (Fischer et al., 2016; Lingappa et al., 2019).

***Modern microbial models for ancient physiologies.*** The choice of a model cyanobacterium for physiological experiments applicable to the Precambrian oceans is of great importance (Hamilton, 2019; Hamilton et al., 2016). Many terrestrial cyanobacteria thrive under the 10-100  $\mu M$   $Fe^{2+}$  concentrations predicted for Archean oceans (Brown et al., 2005; Ionescu et al., 2014; Thompson et al., 2019; Ward et al., 2019; Ward et al., 2017) and either possess

## Microbial helpers allow cyanobacteria to thrive in ferruginous waters

multiple catalases (**Table S1**) and/or have novel defense mechanisms such as intracellular iron precipitation (Brown et al., 2010). In contrast, modern marine cyanobacteria (e.g. *Prochlorococcus*) tend to be genetically streamlined for specific modern oceanographic provinces (Partensky and Garczarek, 2010), which are extremely  $\text{Fe}^{2+}$ -poor compared to modern terrestrial and ancient ecosystems.

The closest modern descendants of the ancestral cyanobacteria that evolved into modern marine plankton cyanobacteria are filamentous non-heterocystous *Synechococcales* (Sánchez-Baracaldo, 2015; Sánchez-Baracaldo and Cardona, 2020). KatG was likely present in ancestors of marine cyanobacteria (Bernroither et al., 2009; Zamocky et al., 2012), whereas KatE was likely horizontally transferred from Proteobacteria and Planctomycetes to some cyanobacterial lineages (e.g. Nostocales; Zamocky et al., 2012). *Synechococcus* PCC 7002 lacks  $\text{Mn}^{2+}$ -catalase, which is widespread in terrestrial cyanobacteria (Ballal et al., 2020; Banerjee et al., 2012; Bihani et al., 2016; Chakravarty et al., 2016; Chen et al., 2020) (**Table S1**) and was likely present in early cyanobacterial lineages (Klotz and Loewen, 2003; Zamocky et al., 2012).

Previous genetic studies of  $\text{Fe}^{2+}$ -induced oxidative stress have studied cyanobacteria that cannot cope with high  $\text{Fe}^{2+}$  and  $\text{H}_2\text{O}_2$ , e.g. *Synechocystis* PCC 6803 (Li et al., 2004; Shcolnick et al., 2009) in monoculture. In nature, ROS and  $\text{O}_2$  cycling are communal processes. Thus, models that include shared mechanisms of survival are important to consider on the early Earth, particularly as gene pools were more limited and were in the process of expansion. We advocate for future studies on more deeply branching cyanobacterial species with additional ROS defense mechanisms and on the molecular evolution of the Mn transporters and catalases discussed herein. We also encourage more explicit incorporation of microbial interactions in large-scale models of biogeochemical cycling on the ancient Earth.

## Materials and Methods

**Bacterial strains.** *Synechococcus* sp. PCC 7002 was ordered from the Pasteur Culture collection of Cyanobacteria. *Shewanella oneidensis* MR-1 and *Shewanella algae* BrY were kind gifts from the lab of Dr. Thomas DiChristina (Georgia Institute of Technology). *Shewanella loihica* PV-4 was a kind gift from Dr. Jeffrey Gralnick (University of Minnesota).

**Experimental setup and growth conditions.** *Synechococcus* sp. PCC 7002 was grown in serum bottles containing modified A+ medium (Stevens Jr. et al., 1973) with  $10 \text{ g L}^{-1}$  NaCl,

## Microbial helpers allow cyanobacteria to thrive in ferruginous waters

TRIS buffer (pH 7.2), and 10 mM  $\text{NH}_4^+$  as the nitrogen source. *Shewanella* spp. were grown overnight in lysogeny broth (LB, 10 g  $\text{L}^{-1}$  NaCl, 10 g  $\text{L}^{-1}$  tryptone, 5 g  $\text{L}^{-1}$  yeast extract) and transferred into serum bottles containing modified A+ medium with amino acids (20 mg  $\text{L}^{-1}$  L-serine, 20 mg  $\text{L}^{-1}$  L-arginine, and 20 mg  $\text{L}^{-1}$  L-glutamic acid), 20 mM lactate as electron donor, and 20 mM fumarate as electron acceptor. Bottles were flushed with 90%  $\text{N}_2$ /10%  $\text{CO}_2$  and opened inside an anoxic chamber (5%  $\text{CO}_2$ /4%  $\text{H}_2$ /91%  $\text{N}_2$ ). Cultures were washed with anoxic A+ medium and combined at optical density of 600 nm ( $\text{OD}_{600}$ ) = 0.01. Co-cultures were grown in triplicate in 10 mL-well tissue culture plates inside the anoxic chamber (5%  $\text{CO}_2$ /4%  $\text{H}_2$ /91%  $\text{N}_2$ ). Cultures were mixed daily by gentle pipetting ~50% of the volume three times in order to resuspend cells and particulate Fe(III) oxides; if not mixed regularly, PCC 7002 would grow at the bottom of the well. Light was provided with a fluorescent light in a 12:12 light:dark timer-controlled cycle.  $\text{FeCl}_2$  was added at a final concentration of 25, 500, or 1000  $\mu\text{M}$ .

**Cyanobacterial quantification by flow cytometry.** Cell numbers of *Synechococcus* sp. PCC 7002 were quantified in an LSR Fortessa flow cytometer using FACSDiva™ (BD Biosciences, CA). At each time point, 200  $\mu\text{L}$  of culture was loaded into a 96-well plate inside the anoxic chamber, covered in parafilm to minimize  $\text{Fe}^{2+}$  oxidation, transported to the cytometer, and mixed twice in the cytometer. Samples (10  $\mu\text{L}$ ) were injected and run at a rate of 0.5  $\mu\text{L s}^{-1}$ . Cyanobacteria were detected by phycocyanin/chlorophyll autofluorescence using blue (488 nm) and yellow-green lasers (561 nm) measured at 655-684 nm (Hill et al., 2017). Optimization and calibration of the quantification parameters were achieved using yellow-green 1  $\mu\text{m}$  microspheres (441/485 ex/em; Polysciences, PA). Live cyanobacteria were also quantified using Syto9 using FITC filters. Events above the thresholds of PerCP and FITC were considered live cyanobacteria. Propidium iodide could not be used to identify “dead” cyanobacteria, as the emission spectra overlapped with that of their autofluorescence. Due to spectral overlap with iron particles, *Shewanella* cells could not be accurately quantified by cytometry.

**$\text{H}_2\text{O}_2$  resistance assays.** Six *Shewanella* strains were incubated in 96-well plates with minimal M1 media (Myers and Nealson, 1988) with lactate (10 mM) or acetate (10 mM) as electron donor under oxic conditions. Growth was monitored periodically (every 1-2 hours) by  $\text{OD}_{600}$  in a spectrophotometer with plate-reading capacity (Tecan, Switzerland). Hydrogen peroxide was added after an initial period of growth for 4 hours, at a final concentration of 10, 25, 50, 100, or 250  $\mu\text{M}$ , after which growth continued to be monitored. (Note: these

## Microbial helpers allow cyanobacteria to thrive in ferruginous waters

concentrations are 10-10,000x higher than most natural waters, which rarely exceed 1  $\mu\text{M}$   $\text{H}_2\text{O}_2$  (Cooper et al., 1988)).

***H<sub>2</sub>O<sub>2</sub> scavenging assays.*** We compared the abilities of the *Shewanella* spp. to remove  $\text{H}_2\text{O}_2$  from their environment in cell suspensions. Strains were seeded in lysogeny broth (LB, 10 g  $\text{L}^{-1}$  NaCl, 10 g  $\text{L}^{-1}$  tryptone, 5 g  $\text{L}^{-1}$  yeast extract, Sigma-Aldrich) at 30°C with shaking overnight, harvested by centrifugation at 12,300 x g, washed, and transferred into minimal M1 medium amended with 20 mM lactate at  $\text{OD}_{600} = 0.02$ . Cells were incubated at 30°C with shaking until harvesting at mid-log phase ( $\text{OD}_{600} = 0.15-0.35$ ), washed twice with minimal medium, then inoculated at  $\text{OD}_{600} = 0.05$  into a 24-well plate holding 2 mL minimal M1 medium amended with 20 mM lactate and various concentrations of  $\text{H}_2\text{O}_2$  (0-5000  $\mu\text{M}$ ). Samples were collected every 3-5 minutes and analyzed immediately for exogenous  $\text{H}_2\text{O}_2$  using the resorufin-horseradish peroxidase colorimetric assay (Zhou et al., 1997). Plates were incubated under oxic conditions at room temperature with shaking for the duration of the experiment (30-200 min).  $\text{H}_2\text{O}_2$  disappearance followed an exponential decay (Eq. 2). First-order apparent rate constants (k) were obtained by plotting the data as shown in Eq. 3, where k is the slope of the graph with  $\ln[\text{H}_2\text{O}_{2(t=0)}/\text{H}_2\text{O}_{2(t=n)}]$  on the y-axis and time on the x-axis.

$$\text{H}_2\text{O}_{2(t=n)} = \text{H}_2\text{O}_{2(t=0)} e^{-kt} \quad (\text{Eq. 2})$$

$$\ln[\text{H}_2\text{O}_{2(t=0)}/\text{H}_2\text{O}_{2(t=n)}] = kt \quad (\text{Eq. 3})$$

***Unique proteins.*** Proteins present in *Shewanella algae* MN-01 and *Shewanella baltica* OS155 and absent in *Shewanella algae* BrY, *Shewanella oneidensis* MR-1, and *Shewanella loihica* PV-4 were identified using the Protein Families tool in PATRIC using three protein family databases: PATRIC cross-genus families (PGfams), PATRIC genus-specific families (PLfams), and FIGfam.

***Synechococcus monoculture experiments.*** To determine the influence of 1 mM  $\text{Mn}^{2+}$  on *Synechococcus* PCC 7002 growth with and without 1 mM  $\text{Fe}^{2+}$ , *Synechococcus* was grown in modified A+ medium containing 82 mM bicarbonate in Hungate tubes with bromobutyl rubber stoppers containing 95%  $\text{N}_2$ /5%  $\text{H}_2$  headspace with constant shaking at 200 rpm under constant light. Growth was determined by measurement of optical density at 750 nm ( $\text{OD}_{750}$ ).

# Microbial helpers allow cyanobacteria to thrive in ferruginous waters

**Table 1. Locus tags of ROS response proteins in the bacterial species in this study. None contained Mn-catalase or Ni-superoxide dismutase. “—” indicates no homolog in genome.**  
OxyR: hydrogen peroxide inducible gene activator; KatG: catalase-peroxidase (clade 1); KatE: periplasmic catalase (clade 3); AhpC: alkyl hydroperoxide reductase; Dps/MrgA: DNA-binding ferritin-like protein; BtuE: glutathione peroxidase; SitA and MntA: ABC-type Mn<sup>2+</sup> transporters; MntH: NRAMP-type MntH Mn<sup>2+</sup> transporter. KatG cellular localization based on PSORTb (Yu et al., 2010): C: cytoplasmic; U: unknown.

| Species                           | Locus prefix   | OxyR or PerR | KatG                                     | KatE  | AhpC    | Dps/MrgA    | BtuE         | MntA | SitA | MntH  |
|-----------------------------------|----------------|--------------|------------------------------------------|-------|---------|-------------|--------------|------|------|-------|
| <i>Synechococcus PCC 7002</i>     | SYN PCC 7002_A | 1836         | 2422 <sup>C</sup>                        | —     | 0558    | 0031        | 0117         | 1734 | 2501 | —     |
| <i>Shewanella baltica</i> OS155   | Sbal_          | 1181         | 0875 <sup>C</sup>                        | 0894  | 0849    | 3285        | 1384         | —    | —    | 0678  |
| <i>Shewanella algae</i> MN-01     | AMR44_         | 05180        | 15815 <sup>U</sup><br>20550 <sup>C</sup> | 04925 | RS11285 | RS07<br>720 | 08935        | —    | —    | 05235 |
| <i>Shewanella loihica</i> PV-4    | Shew_          | 1035         | 0709 <sup>U</sup>                        | 3190  | 0792    | —           | 2741         | —    | —    | 2965  |
| <i>Shewanella oneidensis</i> MR-1 | SO_            | 1328         | 0725 <sup>U</sup><br>4405 <sup>C</sup>   | 1070  | 0958    | 1158        | 1563<br>3349 | —    | —    | —     |
| <i>Shewanella algae</i> BrY       | BFS86_         | 05230        | 17460 <sup>U</sup>                       | 16195 | 00635   | RS11<br>070 | 19140        | —    | —    | —     |

# Microbial helpers allow cyanobacteria to thrive in ferruginous waters

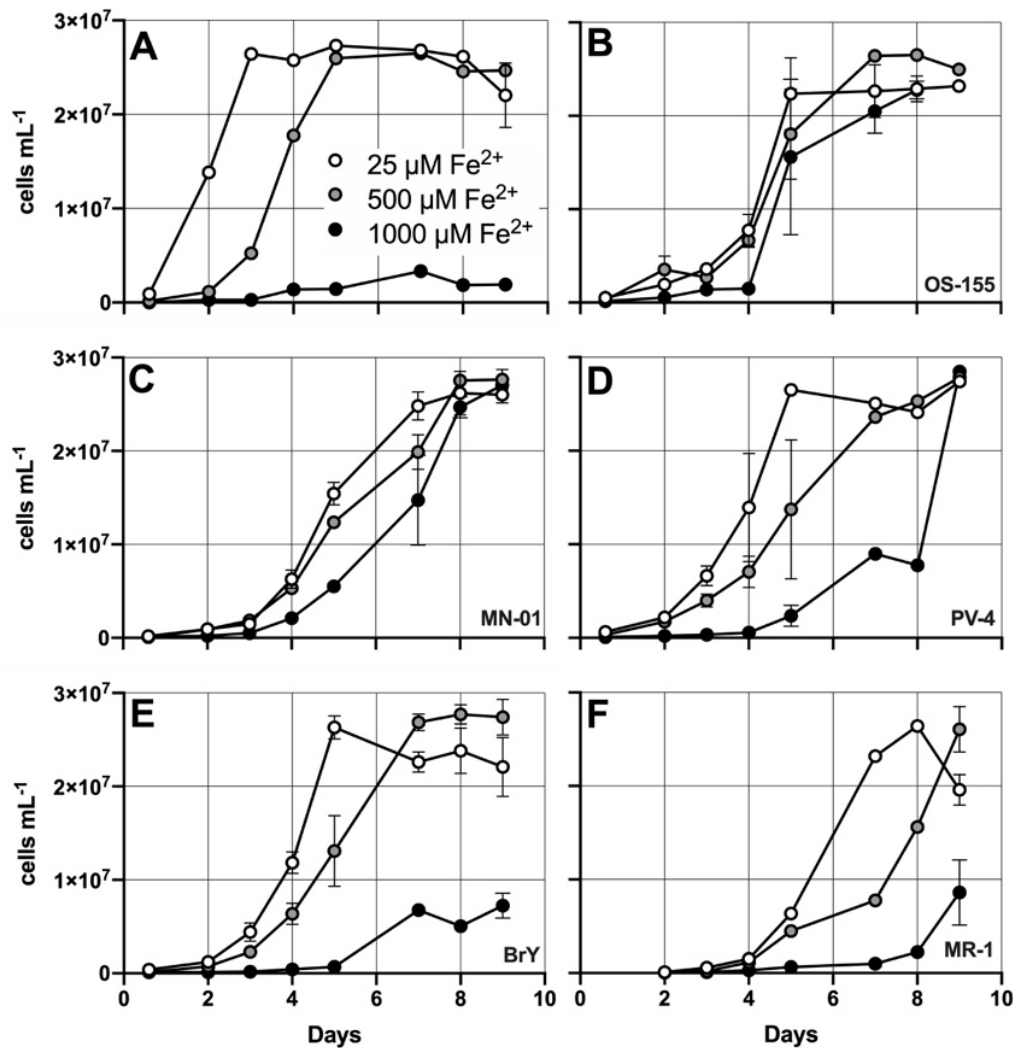

**Figure 1. Growth of *Synechococcus* PCC 7002 in mono- or co-culture with *Shewanella* spp. with varying Fe<sup>2+</sup>.** Co-cultures are: A) none, B) *Shewanella baltica* OS-155, C) *Shewanella algae* MN-01, D) *Shewanella loihica* PV-4, E) *Shewanella algae* BrY, F) *Shewanella oneidensis* MR-1. Error bars represent the standard error of the mean (n=3).



## Microbial helpers allow cyanobacteria to thrive in ferruginous waters

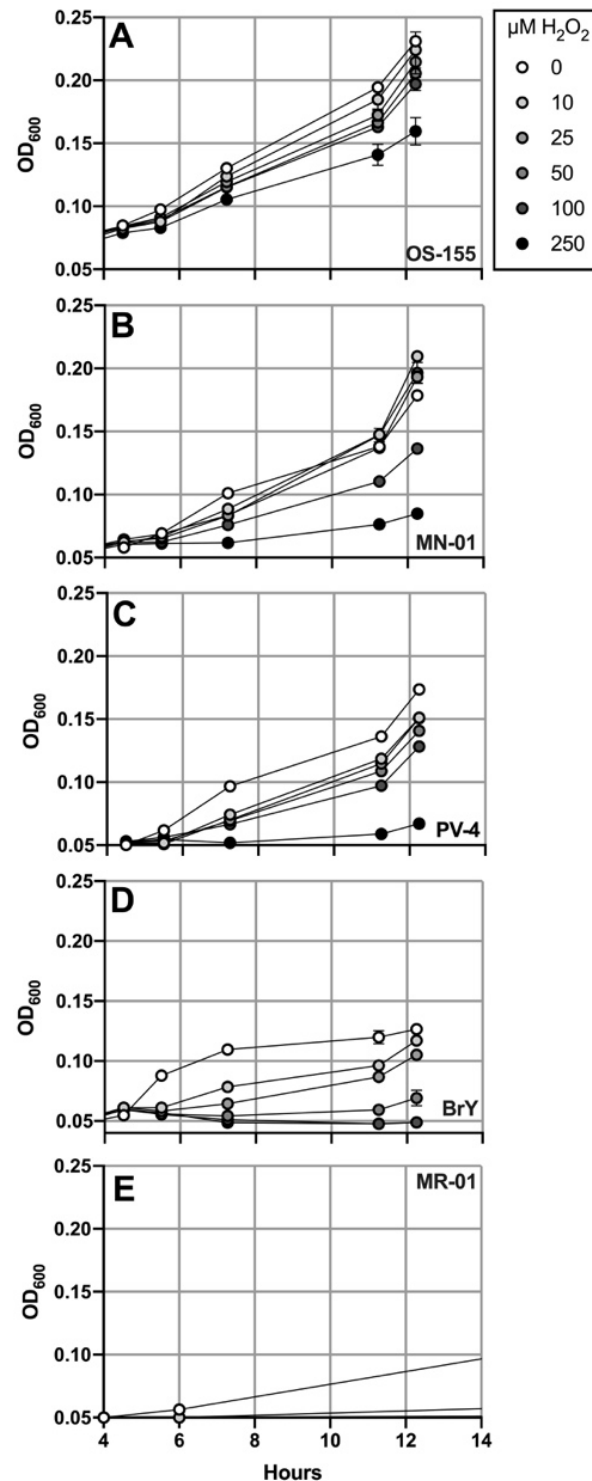

**Figure 2. Growth of *Shewanella* spp. with varying  $H_2O_2$ .** A) *Shewanella baltica* OS-155, B) *Shewanella algae* MN-01, C) *Shewanella loihica* PV-4, D) *Shewanella algae* BrY, E) *Shewanella oneidensis* MR-1. Error bars represent the standard error of the mean (n=3 for all except *S. baltica* OS-155, n=2).  $H_2O_2$  was added at the four-hour timepoint.

# Microbial helpers allow cyanobacteria to thrive in ferruginous waters

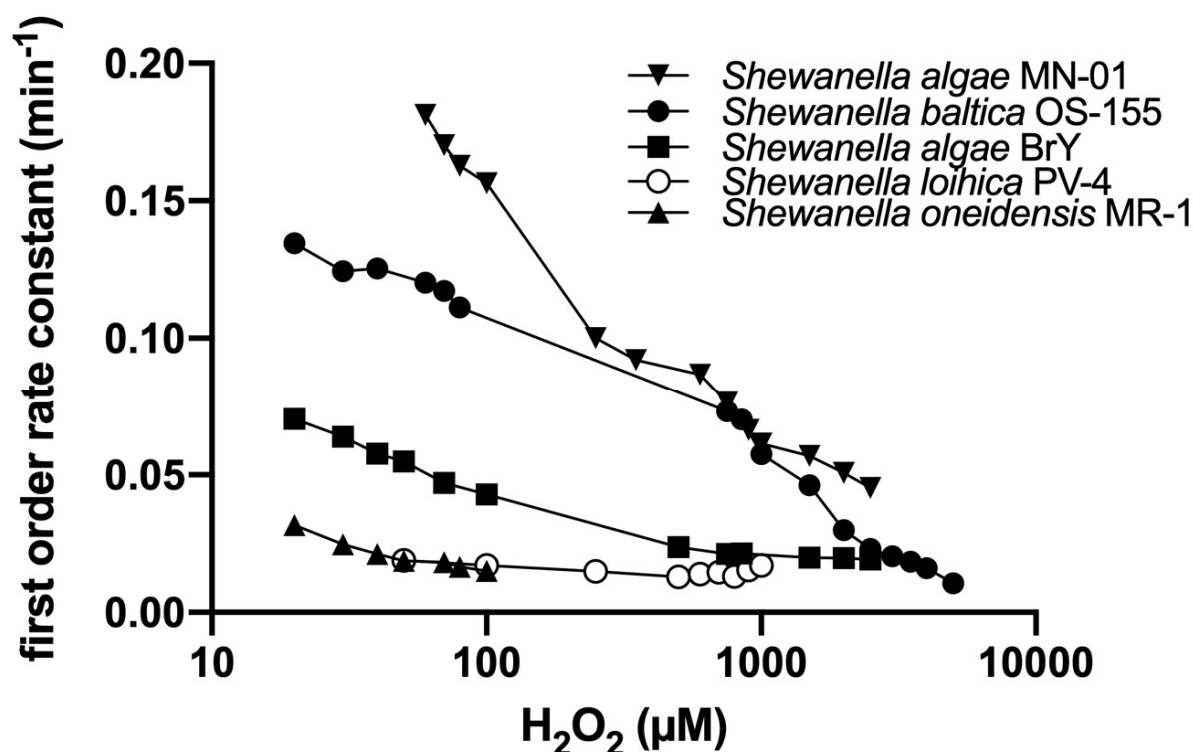

**Figure 3. H<sub>2</sub>O<sub>2</sub> peroxide scavenging capacity of *Shewanella* spp. shown as the first order rate constant plotted versus initial H<sub>2</sub>O<sub>2</sub> concentration. No change in H<sub>2</sub>O<sub>2</sub> was observed in the abiotic control.**

# Microbial helpers allow cyanobacteria to thrive in ferruginous waters

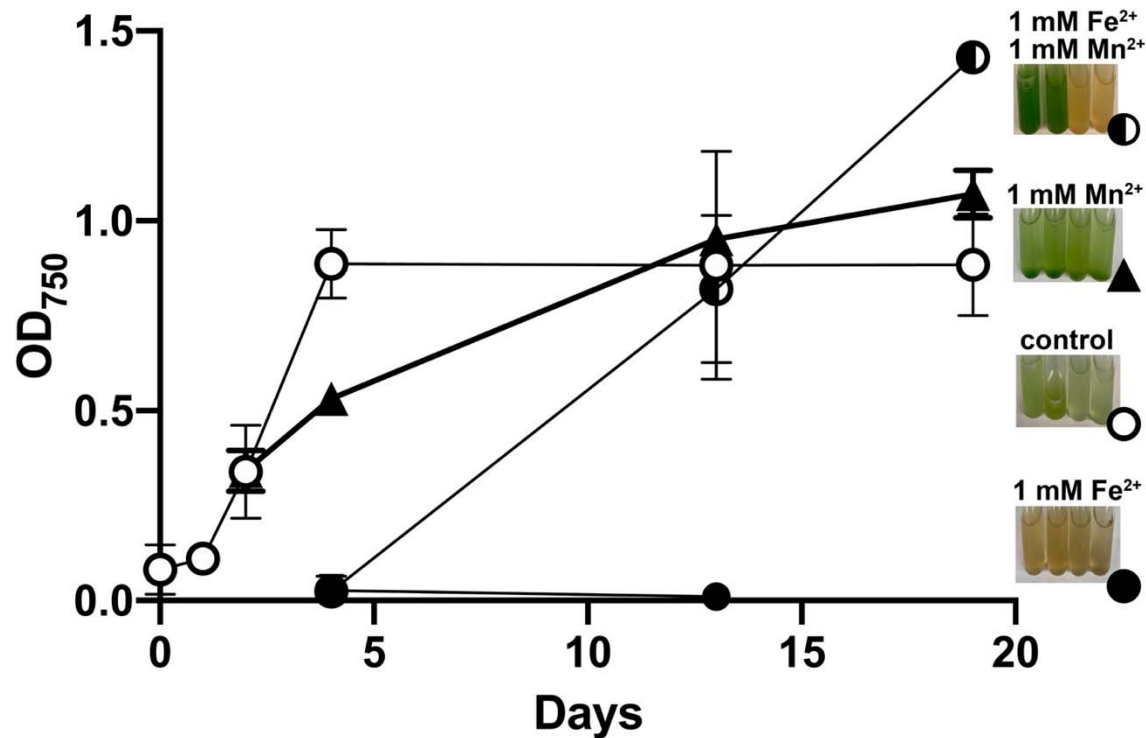

**Figure 4. Growth of *Synechococcus* sp. PCC 7002 in monoculture with 1 mM Fe<sup>2+</sup> and/or 1 mM Mn<sup>2+</sup>.** Controls had background levels of ~140  $\mu$ M Fe<sup>2+</sup> and ~220  $\mu$ M Mn<sup>2+</sup>. The growth curve for the 1 mM Fe<sup>2+</sup> + 1 mM Mn<sup>2+</sup> treatment is shown for the two replicates (out of four) that grew. Photos were taken on day 13.

## Microbial helpers allow cyanobacteria to thrive in ferruginous waters

### 374 Supplemental tables

375 **Table S1. Cyanobacterial genomes containing MnKat, KatE, or KatG.** Appended as separate  
376 spreadsheet.

377  
378 **Table S2. Proteins that are present in *Shewanella algae* MN-01 and *Shewanella baltica***  
379 **OS155 and are not present in *Shewanella oneidensis* MR-1, *Shewanella algae* BrY, and**  
380 ***Shewanella loihica* PV-4.** Appended as separate spreadsheet.

381

# Microbial helpers allow cyanobacteria to thrive in ferruginous waters

## References

- Aguirre, J. D., & Culotta, V. C. (2012). Battles with iron: manganese in oxidative stress protection. *Journal of Biological Chemistry*, 287, 13541-13548.
- Anjem, A., Varghese, S., & Imlay, J. A. (2009). Manganese import is a key element of the OxyR response to hydrogen peroxide in *Escherichia coli*. *Molecular Microbiology*, 72, 844-858.
- Archibald, F. S., & Fridovich, I. (1982). The scavenging of superoxide radical by manganous complexes: in vitro. *Archives of Biochemistry and Biophysics*, 214, 452-463.
- Ballal, A., Chakravarty, D., Bihani, S. C., & Banerjee, M. (2020). Gazing into the remarkable world of non-heme catalases through the window of the cyanobacterial Mn-catalase 'KatB'. *Free Radical Biology and Medicine*, 160, 480-487.
- Banerjee, M., Ballal, A., & Apte, S. K. (2012). Mn-catalase (Alr0998) protects the photosynthetic, nitrogen-fixing cyanobacterium *Anabaena PCC7120* from oxidative stress. *Environmental Microbiology*, 14, 2891-2900.
- Bar-On, Y. M., Phillips, R., & Milo, R. (2018). The biomass distribution on Earth. *Proceedings of the National Academy of Sciences*, 115, 6506-6511.
- Barnese, K., Gralla, E. B., Valentine, J. S., & Cabelli, D. E. (2012). Biologically relevant mechanism for catalytic superoxide removal by simple manganese compounds. *Proceedings of the National Academy of Sciences*, 109, 6892-6897.
- Battistuzzi, F. U., Feijao, A., & Hedges, S. B. (2004). A genomic timescale of prokaryote evolution: insights into the origin of methanogenesis, phototrophy, and the colonization of land. *BMC Evolutionary Biology*, 4.
- Beliaev, A. S., Romine, M. F., Serres, M., Bernstein, H. C., Linggi, B. E., Markillie, L. M., Isern, N. G., Chrisler, W. B., Kucek, L. A., Hill, E. A., Pinchuk, G. E., Bryant, D. A., Wiley, H. S., Fredrickson, J. K., & Konopka, A. (2014). Inference of interactions in cyanobacterial-heterotrophic co-cultures via transcriptome sequencing. *The ISME Journal*, 8, 2243-2255.
- Ben Said, S., & Or, D. (2017). Synthetic microbial ecology: engineering habitats for modular consortia. *Frontiers in Microbiology*, 8, 1125.
- Bernroither, M., Zamocky, M., Furtmüller, P. G., Peschek, G. A., & Obinger, C. (2009). Occurrence, phylogeny, structure, and function of catalases and peroxidases in cyanobacteria. *Journal of Experimental Botany*, 60, 423-440.
- Bihani, S. C., Chakravarty, D., & Ballal, A. (2016). KatB, a cyanobacterial Mn-catalase with unique active site configuration: Implications for enzyme function. *Free Radical Biology and Medicine*, 93, 118-129.
- Biller, S. J., Coe, A., & Chisholm, S. W. (2016). Torn apart and reunited: impact of a heterotroph on the transcriptome of *Prochlorococcus*. *The ISME Journal*, 10, 2831-2843.
- Blank, C. E., & Sanchez-Baracaldo, P. (2010). Timing of morphological and ecological innovations in the cyanobacteria - a key to understanding the rise in atmospheric oxygen. *Geobiology*, 8, 1-23.
- Braakman, R., Follows, M. J., & Chisholm, S. W. (2017). Metabolic evolution and the self-organization of ecosystems. *Proceedings of the National Academy of Sciences*, 114, E3091-E3100.
- Brown, I. I., Bryant, D. A., Casamatta, D., Thomas-Keppta, K. L., Sarkisova, S. A., Shen, G., Graham, J. E., Boyd, E. S., Peters, J. W., & Garrison, D. H. (2010). Polyphasic characterization of a thermotolerant siderophilic filamentous cyanobacterium that produces intracellular iron deposits. *Applied and Environmental Microbiology*, 76, 6664-6672.
- Brown, I. I., Mummey, D., & Cooksey, K. E. (2005). A novel cyanobacterium exhibiting an elevated tolerance for iron. *FEMS Microbiology Ecology*, 52, 307-314.
- Canfield, D. E. (2005). The early history of atmospheric oxygen: homage to Robert M. Garrels. *Annual Review of Earth and Planetary Sciences*, 33, 1-36.
- Canfield, D. E., Rosing, M. T., & Bjerrum, C. (2006). Early anaerobic metabolisms. *Philosophical Transactions of the Royal Society of London. Series B, Biological Sciences*, 361, 1819-1836.

## Microbial helpers allow cyanobacteria to thrive in ferruginous waters

- Cardona, T., Sánchez-Baracaldo, P., Rutherford, A. W., & Larkum, A. W. (2019). Early Archean origin of Photosystem II. *Geobiology*, 17, 127-150.
- Catling, D. C., Zahnle, K. J., & McKay, C. P. (2001). Biogenic methane, hydrogen escape, and the irreversible oxidation of early Earth. *Science*, 293, 839-843.
- Cavalier-Smith, T. (2006a). Cell evolution and Earth history: stasis and revolution. *Philosophical Transactions of the Royal Society of London. Series B, Biological Sciences*, 361, 969-1006.
- Cavalier-Smith, T. (2006b). Rooting the tree of life by transition analyses. *Biology Direct*, 1, 19.
- Chakravarty, D., Banerjee, M., Bihani, S. C., & Ballal, A. (2016). A salt-inducible Mn-catalase (KatB) protects cyanobacterium from oxidative stress. *Plant Physiology*, 170, 761-773.
- Chen, H., Xu, G., Zhao, Y., Tian, B., Lu, H., Yu, X., Xu, Z., Ying, N., Hu, S., & Hua, Y. (2008). A novel OxyR sensor and regulator of hydrogen peroxide stress with one cysteine residue in *Deinococcus radiodurans*. *PLoS ONE*, 3, e1602.
- Chen, M.-Y., Teng, W.-K., Zhao, L., Hu, C.-X., Zhou, Y.-K., Han, B.-P., Song, L.-R., & Shu, W.-S. (2020). Comparative genomics reveals insights into cyanobacterial evolution and habitat adaptation. *The ISME Journal*, 1-17.
- Cheton, P. L., & Archibald, F. S. (1988). Manganese complexes and the generation and scavenging of hydroxyl free radicals. *Free Radical Biology and Medicine*, 5, 325-333.
- Chisholm, S. W. (2017). *Prochlorococcus*. *Current Biology*, 27, R447-R448.
- Christie-Oleza, J. A., Sousoni, D., Lloyd, M., Armengaud, J., & Scanlan, D. J. (2017). Nutrient recycling facilitates long-term stability of marine microbial phototroph–heterotroph interactions. *Nature Microbiology*, 2, 17100.
- Cooper, W. J., Zika, R. G., Petasne, R. G., & Plane, J. M. (1988). Photochemical formation of hydrogen peroxide in natural waters exposed to sunlight. *Environmental Science & Technology*, 22, 1156-1160.
- Daly, M. J., Gaidamakova, E. K., Matrosova, V., Vasilenko, A., Zhai, M., Venkateswaran, A., Hess, M., Omelchenko, M., Kostandarites, H. M., & Makarova, K. (2004). Accumulation of Mn (II) in *Deinococcus radiodurans* facilitates gamma-radiation resistance. *Science*, 306, 1025-1028.
- Derry, L. A. (2015). Causes and consequences of mid-Proterozoic anoxia. *Geophysical Research Letters*, 42, 8538-8546.
- Drever, J. (1974). Geochemical model for the origin of Precambrian banded iron formations. *GSA Bulletin*, 85, 1099-1106.
- Fischer, W. W., Hemp, J., & Valentine, J. S. (2016). How did life survive Earth's great oxygenation? *Current Opinion in Chemical Biology*, 31, 166-178.
- Goldenfeld, N., & Woese, C. (2011). Life is physics: Evolution as a collective phenomenon far from equilibrium. *Annual Review of Condensed Matter Physics*, 2, 375-399.
- Hajam, I. A., Dar, P. A., Shahnawaz, I., Jaume, J. C., & Lee, J. H. (2017). Bacterial flagellin—a potent immunomodulatory agent. *Experimental & Molecular Medicine*, 49, e373-e373.
- Hamilton, T. L. (2019). The trouble with oxygen: The ecophysiology of extant phototrophs and implications for the evolution of oxygenic photosynthesis. *Free Radical Biology and Medicine*, 140, 233-249.
- Hamilton, T. L., Bryant, D. A., & Macalady, J. L. (2016). The role of biology in planetary evolution: cyanobacterial primary production in low-oxygen Proterozoic oceans. *Environmental Microbiology*, 18, 325-340.
- Hanaoka, Y., Takebe, F., Nodasaka, Y., Hara, I., Matsuyama, H., & Yumoto, I. (2013). Growth-dependent catalase localization in *Exiguobacterium oxidotolerans* T-2-2T reflected by catalase activity of cells. *PLoS ONE*, 8, e76862.
- Hansel, C. M. (2017). Manganese in marine microbiology. In: *Advances in Microbial Physiology*. Elsevier, pp. 37-83.
- Hansel, C. M., & Diaz, J. M. (2020). Production of extracellular reactive oxygen species by marine biota. *Annual Review of Marine Science*, 13.



## Microbial helpers allow cyanobacteria to thrive in ferruginous waters

- 482 Haqq-Misra, J., Kasting, J. F., & Lee, S. (2011). Availability of O<sub>2</sub> and H<sub>2</sub>O<sub>2</sub> on pre-photosynthetic  
483 Earth. *Astrobiology*, 11, 293-302.
- 484 Hernandez, M. E., Kappler, A., & Newman, D. K. (2004). Phenazines and Other Redox-Active  
485 Antibiotics Promote Microbial Mineral Reduction. *Applied and Environmental Microbiology*, 70,  
486 921-928.
- 487 Herrmann, A. J., & Gehring, M. M. (2019). An investigation into the effects of increasing salinity on  
488 photosynthesis in freshwater unicellular cyanobacteria during the late Archaean. *Geobiology*, 17,  
489 343-359.
- 490 Hill, E. A., Chrisler, W. B., Beliaev, A. S., & Bernstein, H. C. (2017). A flexible microbial co-culture  
491 platform for simultaneous utilization of methane and carbon dioxide from gas feedstocks.  
492 *Bioresource Technology*, 228, 250-256.
- 493 Holland, H. D. (1973). The Oceans; A Possible Source of Iron in Iron-Formations. *Economic Geology*,  
494 68, 1169-1172.
- 495 Holland, H. D. (1984). *The chemical evolution of the atmosphere and oceans*, Princeton University Press.
- 496 Holland, H. D. (2002). Volcanic gases, black smokers, and the great oxidation event. *Geochimica et*  
497 *Cosmochimica Acta*, 66, 3811-3826.
- 498 Holland, H. D. (2009). Why the atmosphere became oxygenated: A proposal. *Geochimica et*  
499 *Cosmochimica Acta*, 73, 5241-5255.
- 500 Horsburgh, M. J., Wharton, S. J., Karavolos, M., & Foster, S. J. (2002). Manganese: elemental defence  
501 for a life with oxygen. *Trends in Microbiology*, 10, 496-501.
- 502 Imlay, J. A. (2003). Pathways of oxidative damage. *Annual Reviews in Microbiology*, 57, 395-418.
- 503 Imlay, J. A. (2008). Cellular defenses against superoxide and hydrogen peroxide. *Annual Review of*  
504 *Biochemistry*, 77, 755-776.
- 505 Imlay, J. A. (2013). The molecular mechanisms and physiological consequences of oxidative stress:  
506 lessons from a model bacterium. *Nature Reviews Microbiology*, 11, 443-454.
- 507 Ionescu, D., Buchmann, B., Heim, C., Häusler, S., De Beer, D., & Polerecky, L. (2014). Oxygenic  
508 photosynthesis as a protection mechanism for cyanobacteria against iron-encrustation in  
509 environments with high Fe<sup>2+</sup> concentrations. *Frontiers in Microbiology*, 5, 459.
- 510 Jiang, Y., Dong, Y., Luo, Q., Li, N., Wu, G., & Gao, H. (2014). Protection from oxidative stress relies  
511 mainly on derepression of OxyR-dependent KatB and Dps in *Shewanella oneidensis*. *Journal of*  
512 *Bacteriology*, 196, 445-458.
- 513 Johnson, J. E., Webb, S. M., Ma, C., & Fischer, W. W. (2016). Manganese mineralogy and diagenesis in  
514 the sedimentary rock record. *Geochimica et Cosmochimica Acta*, 173, 210-231.
- 515 Johnston, D. T., Wolfe-Simon, F., Pearson, A., & Knoll, A. H. (2009). Anoxygenic photosynthesis  
516 modulated Proterozoic oxygen and sustained Earth's middle age. *Proceedings of the National*  
517 *Academy of Sciences*, 106, 16925-16929.
- 518 Kehres, D. G., Janakiraman, A., Slauch, J. M., & Maguire, M. E. (2002). Regulation of *Salmonella*  
519 *enterica* serovar Typhimurium *mntH* transcription by H<sub>2</sub>O<sub>2</sub>, Fe<sup>2+</sup>, and Mn<sup>2+</sup>. *Journal of*  
520 *Bacteriology*, 184, 3151-3158.
- 521 Kendall, B., Reinhard, C. T., Lyons, T. W., Kaufman, A. J., Poulton, S. W., & Anbar, A. D. (2010).  
522 Pervasive oxygenation along late Archaean ocean margins. *Nature Geoscience*, 3, 647-652.
- 523 Khademian, M., & Imlay, J. A. (2020). How microbes evolved to tolerate oxygen. *Trends in*  
524 *Microbiology*.
- 525 Klotz, M. G., & Loewen, P. C. (2003). The molecular evolution of catalytic hydroperoxidases: evidence  
526 for multiple lateral transfer of genes between prokaryota and from bacteria into eukaryota.  
527 *Molecular Biology and Evolution*, 20, 1098-1112.
- 528 Komiya, T., Hirata, T., Kitajima, K., Yamamoto, S., Shibuya, T., Sawaki, Y., Ishikawa, T., Shu, D., Li,  
529 Y., & Han, J. (2008). Evolution of the composition of seawater through geologic time, and its  
530 influence on the evolution of life. *Gondwana Research*, 14, 159-174.
- 531 Konhauser, K. O., Lalonde, S. V., Planavsky, N. J., Pecoits, E., Lyons, T. W., Mojzsis, S. J., Rouxel, O.  
532 J., Barley, M. E., Rosiere, C., Fralick, P. W., Kump, L. R., & Bekker, A. (2011). Aerobic

## Microbial helpers allow cyanobacteria to thrive in ferruginous waters

- bacterial pyrite oxidation and acid rock drainage during the Great Oxidation Event. *Nature*, 478, 369-373.
- Lalonde, S. V., & Konhauser, K. O. (2015). Benthic perspective on Earth's oldest evidence for oxygenic photosynthesis. *Proceedings of the National Academy of Sciences*, 112, 995-1000.
- Latifi, A., Ruiz, M., & Zhang, C.-C. (2009). Oxidative stress in cyanobacteria. *FEMS Microbiology Reviews*, 33, 258-278.
- Latour, J.-M. (2015). Manganese, the stress reliever. *Metallomics*, 7, 25-28.
- Lee, Yeung, L. Y., Mckenzie, N. R., Yokoyama, Y., Ozaki, K., & Lenardic, A. (2016). Two-step rise of atmospheric oxygen linked to the growth of continents. *Nature Geoscience*, 9, 417.
- Li, H., Singh, A. K., McIntyre, L. M., & Sherman, L. A. (2004). Differential gene expression in response to hydrogen peroxide and the putative PerR regulon of *Synechocystis* sp. strain PCC 6803. *Journal of Bacteriology*, 186, 3331-3345.
- Lingappa, U. F., Monteverde, D. R., Magyar, J. S., Valentine, J. S., & Fischer, W. W. (2019). How manganese empowered life with dioxygen (and vice versa). *Free Radical Biology and Medicine*, 140, 113-125.
- Liu, W., Hao, J., Elzinga, E. J., Piotrowiak, P., Nanda, V., Yee, N., & Falkowski, P. G. (2020). Anoxic photogeochemical oxidation of manganese carbonate yields manganese oxide. *Proceedings of the National Academy of Sciences*, 117, 22698-22704.
- Luo, G., Ono, S., Beukes, N. J., Wang, D. T., Xie, S., & Summons, R. E. (2016). Rapid oxygenation of Earth's atmosphere 2.33 billion years ago. *Science Advances*, 2, e1600134.
- Lyons, T. W., Reinhard, C. T., & Planavsky, N. J. (2014). The rise of oxygen in Earth's early ocean and atmosphere. *Nature*, 506, 307-315.
- Martin, W. F., Bryant, D. A., & Beatty, J. T. (2018). A physiological perspective on the origin and evolution of photosynthesis. *FEMS Microbiology Reviews*, 42, 205-231.
- Mishra, S., & Imlay, J. (2012). Why do bacteria use so many enzymes to scavenge hydrogen peroxide? *Archives of Biochemistry and Biophysics*, 525, 145-160.
- Morris, J. J., Johnson, Z. I., Szul, M. J., Keller, M., & Zinser, E. R. (2011). Dependence of the cyanobacterium *Prochlorococcus* on hydrogen peroxide scavenging microbes for growth at the ocean's surface. *PLoS ONE*, 6, e16805.
- Morris, J. J., Kirkegaard, R., Szul, M. J., Johnson, Z. I., & Zinser, E. R. (2008). Facilitation of robust growth of *Prochlorococcus* colonies and dilute liquid cultures by "helper" heterotrophic bacteria. *Applied and Environmental Microbiology*, 74, 4530-4534.
- Myers, C. R., & Nealson, K. H. (1988). Bacterial manganese reduction and growth with manganese oxide as the sole electron acceptor. *Science*, 240, 1319-1321.
- Olson, S. L., Kump, L. R., & Kasting, J. F. (2013). Quantifying the areal extent and dissolved oxygen concentrations of Archean oxygen oases. *Chemical Geology*, 362, 35-43.
- Ossa Ossa, F., Hofmann, A., Wille, M., Spangenberg, J. E., Bekker, A., Poulton, S. W., Eickmann, B., & Schoenberg, R. (2018). Aerobic iron and manganese cycling in a redox-stratified Mesoproterozoic epicontinental sea. *Earth and Planetary Science Letters*, 500, 28-40.
- Ozaki, K., Thompson, K. J., Simister, R. L., Crowe, S. A., & Reinhard, C. T. (2019). Anoxygenic photosynthesis and the delayed oxygenation of Earth's atmosphere. *Nature Communications*, 10, 3026.
- Papp-Wallace, K. M., & Maguire, M. E. (2006). Manganese transport and the role of manganese in virulence. *Annual Reviews in Microbiology*, 60, 187-209.
- Partensky, F., & Garczarek, L. (2010). *Prochlorococcus*: advantages and limits of minimalism. *Annual Review of Marine Science*, 2, 305-331.
- Planavsky, N. J., Asael, D., Hofmann, A., Reinhard, C. T., Lalonde, S. V., Knudsen, A., Wang, X., Ossa Ossa, F., Pecoits, E., Smith, A. J. B., Beukes, N. J., Bekker, A., Johnson, T. M., Konhauser, K. O., Lyons, T. W., & Rouxel, O. J. (2014). Evidence for oxygenic photosynthesis half a billion years before the Great Oxidation Event. *Nature Geoscience*, 7, 283-286.

## Microbial helpers allow cyanobacteria to thrive in ferruginous waters

- Reinhard, C. T., Lalonde, S. V., & Lyons, T. W. (2013a). Oxidative sulfide dissolution on the early Earth. *Chemical Geology*, 362, 44-55.
- Reinhard, C. T., Planavsky, N. J., & Lyons, T. W. (2013b). Long-term sedimentary recycling of rare sulphur isotope anomalies. *Nature*, 497, 100-103.
- Sánchez-Baracaldo, P. (2015). Origin of marine planktonic cyanobacteria. *Scientific Reports*, 5, 17418.
- Sánchez-Baracaldo, P., & Cardona, T. (2020). On the origin of oxygenic photosynthesis and Cyanobacteria. *New Phytologist*, 225, 1440-1446.
- Sekar, R., Shin, H. D., & Dichristina, T. J. (2016). Direct conversion of cellulose and hemicellulose to fermentable sugars by a microbially-driven Fenton reaction. *Bioresource Technology*, 218, 1133-1139.
- Shcolnick, S., Summerfield, T. C., Reytman, L., Sherman, L. A., & Keren, N. (2009). The mechanism of iron homeostasis in the unicellular cyanobacterium *Synechocystis* sp. PCC 6803 and its relationship to oxidative stress. *Plant Physiology*, 150, 2045-2056.
- Smethurst, D. G., Kovalev, N., McKenzie, E. R., Pestov, D. G., & Shcherbik, N. (2020). Iron-mediated degradation of ribosomes under oxidative stress is attenuated by manganese. *Journal of Biological Chemistry*, 295, 17200-17214.
- Sobota, J. M., & Imlay, J. A. (2011). Iron enzyme ribulose-5-phosphate 3-epimerase in *Escherichia coli* is rapidly damaged by hydrogen peroxide but can be protected by manganese. *Proceedings of the National Academy of Sciences*, 108, 5402-5407.
- Song, H., Jiang, G., Poulton, S. W., Wignall, P. B., Tong, J., Song, H., An, Z., Chu, D., Tian, L., She, Z., & Wang, C. (2017). The onset of widespread marine red beds and the evolution of ferruginous oceans. *Nature Communications*, 8, 399.
- Stadtman, E., Berlett, B., & Chock, P. (1990). Manganese-dependent disproportionation of hydrogen peroxide in bicarbonate buffer. *Proceedings of the National Academy of Sciences*, 87, 384-388.
- Stevens Jr., S. E., Patterson, C. O. P., & Myers, J. (1973). The production of hydrogen peroxide by blue-green algae: a survey. *Journal of Phycology*, 9, 427-430.
- Swanner, E. D., Mloszewska, A. M., Cirpka, O. A., Schoenberg, R., Konhauser, K. O., & Kappler, A. (2015a). Modulation of oxygen production in Archaean oceans by episodes of Fe(II) toxicity. *Nature Geoscience*, 8, 126-130.
- Swanner, E. D., Wu, W., Hao, L., Wüstner, M. L., Obst, M., Moran, D. M., Mcilvin, M. R., Saito, M. A., & Kappler, A. (2015b). Physiology, Fe(II) oxidation, and Fe mineral formation by a marine planktonic cyanobacterium grown under ferruginous conditions. *Frontiers in Earth Science*, 3.
- Thompson, K. J., Kenward, P. A., Bauer, K. W., Warchola, T., Gauger, T., Martinez, R., Simister, R. L., Michiels, C. C., Lliros, M., Reinhard, C. T., Kappler, A., Konhauser, K. O., & Crowe, S. A. (2019). Photoferrotrophy, deposition of banded iron formations, and methane production in Archean oceans. *Science Advances*, 5, eaav2869.
- Wan, F., Kong, L., & Gao, H. (2018). Defining the binding determinants of *Shewanella oneidensis* OxyR: implications for the link between the contracted OxyR regulon and adaptation. *Journal of Biological Chemistry*, 293, 4085-4096.
- Wang, Y., & Newman, D. K. (2008). Redox reactions of phenazine antibiotics with ferric (hydr)oxides and molecular oxygen. *Environmental Science & Technology*, 42, 2380-2386.
- Ward, L. M., Idei, A., Nakagawa, M., Ueno, Y., Fischer, W. W., & Mcglynn, S. E. (2019). Geochemical and metagenomic characterization of Jinata Onsen, a Proterozoic-analog hot spring, reveals novel microbial diversity including iron-tolerant phototrophs and thermophilic lithotrophs. *Microbes and Environments*, ME19017.
- Ward, L. M., Idei, A., Terajima, S., Kakegawa, T., Fischer, W. W., & Mcglynn, S. E. (2017). Microbial diversity and iron oxidation at Okuoku-hachikurou Onsen, a Japanese hot spring analog of Precambrian iron formations. *Geobiology*, 15, 817-835.
- Yu, N. Y., Wagner, J. R., Laird, M. R., Melli, G., Rey, S., Lo, R., Dao, P., Sahinalp, S. C., Ester, M., & Foster, L. J. (2010). PSORTb 3.0: improved protein subcellular localization prediction with

## Microbial helpers allow cyanobacteria to thrive in ferruginous waters

- refined localization subcategories and predictive capabilities for all prokaryotes. *Bioinformatics*, 26, 1608-1615.
- Zamocky, M., Furtmuller, P. G., & Obinger, C. (2008). Evolution of catalases from bacteria to humans. *Antioxidants & Redox Signaling*, 10, 1527-1548.
- Zamocky, M., Gasselhuber, B., Furtmuller, P. G., & Obinger, C. (2012). Molecular evolution of hydrogen peroxide degrading enzymes. *Archives of Biochemistry and Biophysics*, 525, 131-144.
- Zhou, M., Diwu, Z., Panchuk-Voloshina, N., & Haugland, R. P. (1997). A stable nonfluorescent derivative of resorufin for the fluorometric determination of trace hydrogen peroxide: applications in detecting the activity of phagocyte NADPH oxidase and other oxidases. *Analytical Biochemistry*, 253, 162-168.
- Zinser, E. R. (2018a). Cross-protection from hydrogen peroxide by helper microbes: the impacts on the cyanobacterium *Prochlorococcus* and other beneficiaries in marine communities. *Environmental Microbiology Reports*, 10, 399-411.
- Zinser, E. R. (2018b). The microbial contribution to reactive oxygen species dynamics in marine ecosystems. *Environmental Microbiology Reports*, 10, 412-427.
